# Supplementary material for: Trends and interaction of polypharmacy and potentially inappropriate prescribing in primary care over 15 years in Ireland: a repeated cross-sectional study
Source: HighWire-hosted journal article supplement (doi:10.1136/bmjopen-2015-008656), 2015-09-01
Supplement: bmjopen-2015-008656supp_appendix2.pdf [file bmjopen-2015-008656supp_appendix2.pdf]

**Appendix 2. Number and percentage of individuals aged  $\geq 65$  years with polypharmacy, excessive polypharmacy and PIP in the study years**

|                                           | <b>1997</b>   | <b>2002</b>   | <b>2007</b>   | <b>2012</b>   |
|-------------------------------------------|---------------|---------------|---------------|---------------|
| <b>N</b>                                  | 78489         | 121726        | 129162        | 133884        |
| <b>Polypharmacy<sup>a</sup></b>           | 13981 (17.8%) | 37654 (30.9%) | 64265 (49.8%) | 80865 (60.4%) |
| <b>Excessive polypharmacy<sup>b</sup></b> | 1205 (1.5%)   | 6589 (5.4%)   | 18521 (14.3%) | 29349 (21.9%) |
| <b>Any PIP</b>                            | 25598 (32.6%) | 34786 (28.6%) | 42416 (32.8%) | 49904 (37.3%) |
| <b>1 PIP</b>                              | 18920 (24.1%) | 26122 (21.5%) | 32046 (24.8%) | 36985 (27.6%) |
| <b>2 PIP</b>                              | 5219 (6.6%)   | 6746 (5.5%)   | 8063 (6.2%)   | 9801 (7.3%)   |
| <b><math>\geq 3</math> PIP</b>            | 1459 (1.9%)   | 1918 (1.6%)   | 2307 (1.8%)   | 3118 (2.3%)   |

Abbreviation: *PIP* potentially inappropriate prescribing

<sup>a</sup> Polypharmacy defined as 5 or more regular medicines.

<sup>b</sup> Excessive polypharmacy defined as 10 or more regular medicines.
